# Supplementary material for: An investigation of the predictors of photoprotection and UVR dose to the face in patients with XP: a protocol using observational mixed methods
Source: PubMed Central journal article supplement (PMC5724163; doi:10.1136/bmjopen-2017-018364), 2017-08-21
Supplement: bmjopen-2017-018364supp002.pdf [file bmjopen-2017-018364supp002.pdf]

## **Appendix 2.**

### **XP N-of-1 questions - FINAL**

*Note: questions answered using a 0-100 sliding scale (not at all – completely; very little – a great deal) unless otherwise indicated*

| <b>Question group</b>                                                                            | <b>Question</b>                                                                                                                         |
|--------------------------------------------------------------------------------------------------|-----------------------------------------------------------------------------------------------------------------------------------------|
| Thinking about the weather today...                                                              | How sunny has it been?                                                                                                                  |
|                                                                                                  | How much did you need to protect yourself from UV?                                                                                      |
| Quality of life (alone)                                                                          | How would you rate your quality of life today? (very poor – very good)                                                                  |
| Thinking generally about your need for UV protection today...                                    | How much have negative thoughts about XP got stuck in your head?                                                                        |
|                                                                                                  | How much have you felt supported by other people?                                                                                       |
|                                                                                                  | How much has it made you feel that you were missing out?                                                                                |
|                                                                                                  | How much have you felt any physical symptoms/effects of UV? (e.g., skin soreness, redness, itching, headaches, uncomfortable eyes etc.) |
| Thinking generally about your feelings today – not necessarily related to XP or UV protection... | How mentally exhausted have you felt?                                                                                                   |
|                                                                                                  | How active have you felt?                                                                                                               |
|                                                                                                  | How would you describe your mood today? (very negative – very positive)                                                                 |
| Screeener (alone)                                                                                | Did you go outside during daylight today?                                                                                               |
| Thinking about protecting your face from UV when you went outside today...                       | How much have you protected your face from UV?                                                                                          |
|                                                                                                  | How much effort have you put into it?                                                                                                   |
|                                                                                                  | How much did you need to think about doing it?                                                                                          |
|                                                                                                  | How much have other things got in the way of it?                                                                                        |
|                                                                                                  | How much stress has it caused you?                                                                                                      |
|                                                                                                  | How self-conscious have you felt?                                                                                                       |
|                                                                                                  | How happy have you been with your level of UV protection?                                                                               |
| Thinking about protecting your face from UV when you go outside tomorrow...                      | How motivated are you?                                                                                                                  |
|                                                                                                  | How confident are you?                                                                                                                  |
|                                                                                                  | How important is it compared to other things you want/need to do?                                                                       |
|                                                                                                  | How much have you planned to make sure you do it?                                                                                       |
